# Supplementary material for: A Techno-Economic Model for Benchmarking the Production Cost of Lithium-Ion Battery Cells
Source: MDPI journal article supplement (doi:10.3390/batteries8080083), 2022-08-05
Supplement: s1 [file s1]

# A Techno-Economic Model for Benchmarking the Production Cost of Lithium-Ion Battery Cells

Sina Orangi <sup>1, 2,\*</sup>, Anders Hammer Strømman <sup>1, 2,\*</sup>

<sup>1</sup> Industrial Ecology Programme, Norwegian University of Science and Technology, 7491 Trondheim, Norway;

<sup>2</sup> Department of Energy and Process Engineering, Faculty of Engineering, Norwegian University of Science and Technology, 7491 Trondheim, Norway;

\* Correspondence: sina.orangi@ntnu.no (S.O.); anders.hammer.stromman@ntnu.no (A.H.S.)

Table S1 includes the unit price of material components as well as the unit price of the relevant machinery for each process step in the battery cell manufacturing plant.

**Table S1.** Unit price of material components and the relevant machinery

| Set index      | Set content           | Parameter                        | Value                      | Unit                  | Reference         |
|----------------|-----------------------|----------------------------------|----------------------------|-----------------------|-------------------|
| H              | $p_{CAM}^h$           | Lithium Carbonate process factor | 5.32                       | [\$/kg]               | [1]               |
|                |                       | Nickel Sulfate process factor    | 2.64                       | [\$/kg]               | [1]               |
|                |                       | Manganese Sulfate process factor | 2.75                       | [\$/kg]               | [1]               |
|                |                       | Cobalt Sulfate process factor    | 2.63                       | [\$/kg]               | [1]               |
| G              | $\bar{p}_{CAM}^g$     | Average price of lithium         | 30.12                      | [\$/kg]               | [2]               |
|                |                       | Average price of nickel          | 19.79                      | [\$/kg]               | [2]               |
|                |                       | Average price of manganese       | 1.22                       | [\$/kg]               | [2]               |
|                |                       | Average price of cobalt          | 59.50                      | [\$/kg]               | [2]               |
|                |                       | Average price of aluminum        | 2.67                       | [\$/kg]               | [2]               |
|                |                       | Cathode active material          | Based on Equations 1 and 2 | [\$/kg]               | Equations 1 and 2 |
| I              | $p_{mat}^i$           | Conductive black carbon          | 5.89                       | [\$/kg]               | [3]               |
|                |                       | Binder cathode                   | 7.08 <sup>1</sup>          | [\$/kg]               | [4]               |
|                |                       | Binder anode                     | 10.0                       | [\$/kg]               | [5]               |
|                |                       | Solvent cathode (NMP)            | 3.10                       | [\$/kg]               | [6]               |
|                |                       | Anode active material graphite   | 11.0                       | [\$/kg]               | [7]               |
|                |                       | Anode active material LTO        | 9.0                        | [\$/kg]               | [8]               |
|                |                       | Anode active material Si-NW      | 66.0                       | [\$/kg]               | [9]               |
|                |                       | Electrolyte                      | 15                         | [\$/liter]            | [1]               |
| J              | $p_{mat}^j$           | Separator                        | 1.0                        | [\$/m <sup>2</sup> ]  | [10]              |
|                |                       | Positive current collector foil  | 0.1 <sup>2</sup>           | [\$/m <sup>2</sup> ]  | [11]              |
|                |                       | Negative current collector foil  | 0.99 <sup>3</sup>          | [\$/m <sup>2</sup> ]  | [12]              |
| K              | $p_{mat}^k$           | Cell container                   | 0.25                       | [\$/item]             | [6]               |
|                |                       | Positive terminal                | 0.28                       | [\$/item]             | [6]               |
|                |                       | Negative terminal                | 0.41                       | [\$/item]             | [6]               |
|                | $\bar{p}_{u=mix,cat}$ | Cathode Mixer                    | 7.28 - 13.76               | [M\$/base case size]  | [13]              |
| U <sup>4</sup> | $\bar{p}_{u=mix,an}$  | Anode Mixer                      | 6.21 - 11.72               | [M\$/ base case size] | [13]              |
|                | $\bar{p}_{u=dr}$      | Dry room                         | 20.00 - 22.00              | [M\$/base case]       | [14]              |
|                | $\bar{p}_{mch}^u$     | Coating and drying cathode       | 6.24 - 13.64               | [M\$/Production line] | [13]              |
|                |                       | Coating and drying anode         | 5.76 - 12.60               | [M\$/Production line] | [13]              |
|                |                       | Calendering cathode              | 1.87 - 3.75                | [M\$/Production line] | [13]              |
|                |                       | Calendering anode                | 1.87 - 3.75                | [M\$/Production line] | [13]              |
|                |                       | Slitting cathode                 | 1.12 - 6.00                | [M\$/Production line] | [13]              |
|                |                       | Slitting anode                   | 1.12 - 6.00                | [M\$/Production line] | [13]              |

|                                                 |               |                       |      |
|-------------------------------------------------|---------------|-----------------------|------|
| Vacuum drying                                   | 4.50 – 8.99   | [M\$/Production line] | [13] |
| Winding                                         | 11.24 – 26.24 | [M\$/Production line] | [13] |
| Packaging<br>(contacting + inserting + sealing) | 7.49 – 14.50  | [M\$/Production line] | [13] |
| Filling<br>(Filling + final Sealing)            | 9.00 - 13.55  | [M\$/Production line] | [13] |
| Formation cycling                               | 52.48 - 67.43 | [M\$/Production line] | [13] |
| Aging                                           | 3.73 – 7.45   | [M\$/Production line] | [13] |
| Testing                                         | 3.73 – 6.00   | [M\$/Production line] | [13] |

<sup>1</sup> Converted from Euro to US\$ [15], <sup>2</sup> Converted from (US\$/ton) to (US\$/m<sup>2</sup>) based on the thickness of positive current collector in the battery cell, <sup>3</sup> Converted from (US\$/ton) to (US\$/m<sup>2</sup>) based on the thickness of negative current collector in the battery cell, <sup>4</sup> Converted from Euro to US\$ [15] and adjusted to the required size of model based on Equation S1.

Regarding the unit price of production lines for each process step in Table S1, in the battery process model [16], a capacity of around 2 GWh per year is presupposed as a base case study where the plant is working at its full capacity, meaning the sizing of all production lines has been based upon this assumption. This assumption is also regarded as the basis of unit price for machines in the plant. Ranges of prices for the state-of-the-art machinery and equipment for the base case study are extracted from [13]. The considered prices in Table S1 have been adjusted to the base case capacity of [16] using the classical six-tenths rule [17],

$$P_{mch,des} = P_{mch,ava} \times \left( \frac{\theta_{des}}{\theta_{ava}} \right)^{P_{mch}} \quad (S1)$$

where  $P_{mch,des}$  is the desired equipment cost,  $P_{mch,ava}$  is the available equipment cost,  $\theta_{des}$  is the production volume for the target case study, and  $\theta_{ava}$  is the production volume for the available machinery cost. In addition,  $P_{mch}$  indicates the relevant scaling power factor for machinery, assumed to be 0.6 in this work.

**Table S2.** Fractional distribution of the operators between different process steps in the battery cell manufacturing plant

| Unit in the process chain  | Percent allocation of operators to units in a working shift [%] <sup>1</sup> |
|----------------------------|------------------------------------------------------------------------------|
| Cathode Mixer              | -                                                                            |
| Anode Mixer                | -                                                                            |
| Cathode coating and drying | 12.5%                                                                        |
| Anode coating and drying   | 12.5%                                                                        |
| Cathode calendering        | 5%                                                                           |
| Anode calendering          | 5%                                                                           |
| Cathode slitting           | 3.75%                                                                        |
| Anode slitting             | 3.75%                                                                        |
| Vacuum drying              | Included in drying unit                                                      |
| Winding                    | 12.5%                                                                        |
| Packaging <sup>2</sup>     | 12.5%                                                                        |
| Filling <sup>3</sup>       | 12.5%                                                                        |
| Formation cycling          | 12.5%                                                                        |
| Aging                      | 3.75%                                                                        |
| Testing                    | 3.75%                                                                        |
| Dry room                   | -                                                                            |

<sup>1</sup> Labor for the mixing and the dry room is explained in Section 2.2.4, <sup>2</sup> Packaging includes contacting of terminals, insertion into the house, and welding the battery house, <sup>3</sup> After the filling, cells are sealed. This step is included in the filling step.

Regarding the input parameters for both process and cost models, the relevant parameters of the NMC111-G battery cell, the case study battery cell, for the process model are listed in the first section of Table S3.

In addition, the common parameters of the cost model for all the locations in this study are listed in the second section of Table S3, and Table S4 includes the parameters which vary with the location of the plant including labor, energy, land and construction, and interest rate.

**Table S3.** Relevant parameters of the battery cell in the case study as inputs to the process and cost models

|               | Parameter          | Value       | Unit                 | Reference |
|---------------|--------------------|-------------|----------------------|-----------|
| Process model | $E_{spf}$          | 264         | (Wh/kg)              | [16]      |
|               | $w$                | 70          | (mm)                 |           |
|               | $l$                | 235         | (mm)                 |           |
|               | $N_{bcl}$          | 37          | -                    | [14]      |
|               | $R$                | 5%          | -                    |           |
|               | $S$                | 8%          | -                    | [16]      |
| Cost model    | $\lambda_{lab}$    | 74%         | -                    | [18–20]   |
|               | $\lambda_{nrg}$    | 14%         | -                    | [18–20]   |
|               | $\lambda_{bld}$    | 12%         | -                    | [18–20]   |
|               | $\beta$            | 2.36        | -                    | [1]       |
|               | $\tau_{mch}$       | 6           | (year)               | [14]      |
|               | $N_{shf}$          | 3           | (day <sup>-1</sup> ) | [16]      |
|               | $\tau_{shf}$       | 8           | (hour/day)           | [16]      |
|               | $\tau_{ubt}$       | 40          | (min/shift)          | [21]      |
|               | $\tau_{nos}$       | 0           | (hour/day)           | [22]      |
|               | $N_{wpy}$          | 300         | (days/year)          | [16]      |
|               | $\tau_{bld}$       | 20          | (year)               | [14]      |
|               | $\gamma_{mnt}$     | 10%         | -                    | [14]      |
|               | $\gamma_{ovh}$     | 33%         | -                    | [14]      |
|               | $\alpha_{tch}$     | 11%         | -                    | [23]      |
|               | $\alpha_{ind,lab}$ | 46%         | -                    | [23]      |
|               | $\alpha_{mch,ins}$ | 0.06 - 0.12 | -                    | [24]      |

Regarding the unit price of electricity, the values used in the project at hand are calculated based on the electricity bill for 1,000,000 (kWh) annual industrial consumption, including the cost of power, distribution, and taxes.

Considering the wage for labor, three different costs for each country are assumed in Table S4; the top one is considered for operators, the middle one is for technicians, and the low one is for indirect labor in the plant. Since the indirect labor comprises different classes of workers, an average hourly wage of five types is assumed, including service activities, professional and scientific, administrative and support service activities, electricity (gas, steam, and air conditioning supply), and water supply (sewerage, waste management, and remediation activities), to meet all requirements of the plant.

For European countries, data are collected from [25]. For China, operator wage is extracted from [26], and for technicians and indirect labor, [27] is used. Since the data are for 2019, they are adjusted using a ratio of 3.6% [28], which is an average rise in wage in China from 2019. For South Korea, the operator's salary is extracted from [29], and technicians' are extracted from [30]. Regarding the Japanese labor cost, data are extracted from the Japan Ministry of Health, Labour, and Welfare [31]. All of these assumptions are included in Table S4.

**Table S4.** Assumed economic factors to study the effect of location on the total cost of cell

| Economic Factor                                          | Location |         |        |        |                    |                    |        |        |                    |
|----------------------------------------------------------|----------|---------|--------|--------|--------------------|--------------------|--------|--------|--------------------|
|                                                          | US       | Germany | Norway | Sweden | China <sup>2</sup> | Korea <sup>3</sup> | Poland | France | Japan <sup>4</sup> |
| Energy <sup>1</sup><br>(\$/kWh)<br>[32]                  | 0.109    | 0.236   | 0.078  | 0.042  | 0.099              | 0.091              | 0.140  | 0.142  | 0.167              |
| Land and Construction<br>(\$/m <sup>2</sup> )<br>[33,34] | 4072     | 4502    | 6161   | 5320   | 2184               | 3147               | 2307   | 4916   | 4801               |
| Labor (\$/hour)<br>[24–31,35]                            | 22.4     | 47.52   | 50.69  | 46.91  | 3.25               | 15.6               | 11.28  | 45.23  | 14.73              |
|                                                          | 26.95    | 52.66   | 67.35  | 55.66  | 5.6                | 22                 | 15.87  | 56.88  | 17.53              |
|                                                          | 26.70    | 44.73   | 54.12  | 44.62  | 5.5                | 18.73              | 12.98  | 53.36  | 16.2               |
| Interest rate<br>[36,37]                                 | 2.3%     | 4.34%   | 6.69%  | 1.89%  | 3.65%              | 1.53%              | 7.64%  | 5.11%  | 1.07%              |

<sup>1</sup> Industrial unit price of energy has been assumed, <sup>2</sup> exchange rate 6.37 for CNY to US\$ [15], <sup>3</sup> exchange rate 1196.5 for KRW to US\$ [15], <sup>4</sup> exchange rate 0.0073 for JPY to US\$

Table S5 includes all the data for different layers of the cost model for the case study battery cell chemistry in Section 3.1.

**Table S5.** A location-wise distribution of the total cell cost of the case study between defined layers of the cost model

| Relevant parameter to layer | Description                | US    | Sweden | Poland | Germany | France | Norway | Korea | China | Japan |
|-----------------------------|----------------------------|-------|--------|--------|---------|--------|--------|-------|-------|-------|
| C <sub>misp</sub>           | Material                   | 68.3  | 72.9   | 65.7   | 74.1    | 73.8   | 74.1   | 66.5  | 64.8  | 67.5  |
|                             | Scrap                      | 8.8   | 9.4    | 8.4    | 9.6     | 9.4    | 9.5    | 8.5   | 8.2   | 8.7   |
| C <sub>nrg</sub>            | Energy                     | 3.2   | 1.4    | 4.1    | 6.9     | 4.2    | 2.3    | 2.7   | 2.7   | 5.0   |
| C <sub>lab</sub>            | Labor                      | 12.1  | 25.3   | 6.0    | 25.6    | 24.4   | 27.3   | 8.4   | 1.7   | 7.9   |
| C <sub>bld</sub>            | Land and buildings         | 3.5   | 4.4    | 3.0    | 4.6     | 5.3    | 7.5    | 2.5   | 2.1   | 3.7   |
| C <sub>eqp</sub>            | Machinery and Installation | 18.3  | 19.2   | 20.1   | 20.3    | 20.5   | 21.5   | 17.6  | 17.9  | 17.3  |
| C <sub>mnt</sub>            | Maintenance                | 1.8   | 1.9    | 2.0    | 2.1     | 2.0    | 2.2    | 1.7   | 1.8   | 1.7   |
| C <sub>ovh</sub>            | Overhead                   | 7.7   | 8.4    | 8.2    | 8.8     | 9.2    | 10.2   | 7.2   | 7.2   | 7.5   |
| C <sub>Cell</sub>           | Total battery cell         | 123.7 | 142.9  | 117.5  | 152.0   | 148.8  | 153.6  | 115.1 | 106.4 | 119.4 |

**Table S6.** Battery cell cost reported in works of literature and available cost models

| Reference | Cell type | Production Volume [GWh.year <sup>-1</sup> ] | Year of study | Value [\$/kWh] | Description                                         | Number on Figure 5 |
|-----------|-----------|---------------------------------------------|---------------|----------------|-----------------------------------------------------|--------------------|
| [38]      | NMC622-G  | -                                           | 2010          | 390            | - For production greater than 100000 packs per year | 1                  |
| [39]      | NMC111-G  | -                                           | 2010          | 195            | - Material level <sup>3</sup>                       | 2                  |
| [5]       | NMC       | -                                           | 2014          | 310            | -                                                   | 3                  |
| [40]      | NMC111-G  | -                                           | 2015          | 502            | - Battery pack level <sup>1</sup>                   | 4                  |
| [22]      | NMC111-G  | -                                           | 2015          | 230            | - Baseline scenario is considered                   | 5                  |
| [41]      | NMC111-G  | -                                           | 2015          | 188            | - Battery pack level <sup>1</sup>                   | 6                  |

|                       |          |     |      |        | - Annual production of 235000 battery packs                                               |          |
|-----------------------|----------|-----|------|--------|-------------------------------------------------------------------------------------------|----------|
| [39]                  | NMC111-G | -   | 2015 | 170    | - Material level <sup>3</sup>                                                             | 7        |
| [14]                  | NMC111-G | 2   | 2017 | 243    | - Baseline scenario                                                                       | 8        |
| [14]                  | NMC111-G | 2   | 2017 | 180    | - Optimistic scenario                                                                     | 9        |
| [42]                  | NMC622-G | -   | 2017 | 432    | - Battery pack level <sup>1</sup>                                                         | 10       |
| [43]                  | NMC111-G | -   | 2018 | 59     | - Low production quantities                                                               | 11       |
| [38]                  | NMC111-G | -   | 2018 | 150    | - Electrode stack level <sup>2</sup>                                                      | 12       |
|                       |          |     |      |        | - For production greater than 100000 packs per year                                       |          |
|                       |          |     |      |        | - Battery pack level <sup>1</sup>                                                         |          |
| [1]                   | NMC111-G | 5   | 2019 | 177.45 | - Calculated with interpolation between 2 GWh and 8 GWh for 66% material cost share       | 13       |
| [6]                   | NMC111-G | 5.3 | 2020 | 116    | - Based on energy use of cell                                                             | 14       |
| [38]                  | NMC622-G | -   | 2020 | 130    | - For production greater than 100000 packs per year                                       | 15       |
| [44]                  | NMC811-G | 6   | 2020 | 119    | -                                                                                         | 16       |
| [45]                  | NMC111-G | -   | 2020 | 169    | - Battery pack level <sup>1</sup>                                                         | 17       |
| [46]                  | -        | -   | 2020 | 102    | -                                                                                         | 18       |
| [47]                  | NMC622-G | 35  | 2021 | 106    | - Base scenario is considered                                                             | 19       |
| [48]                  | -        | -   | 2021 | 131    | Considering annual decrease ratio of 0.13 based on their work to adjust 2020 data to 2021 | 20       |
| [49]                  | -        | -   | 2021 | 101    | -                                                                                         | 21       |
| [50]                  | -        | -   | 2021 | 157    | - Battery pack level <sup>1</sup>                                                         | 22       |
| [47]                  | NMC-G    | 35  | 2021 | 64     | - Production of 100000 packs per year                                                     | 23       |
| US (BCS)              | NMC111-G | 5.3 | 2021 | 123.7  | - Optimized scenario                                                                      | US (BCS) |
| US (MES) <sup>4</sup> | NMC111-G | 7.8 | 2021 | 108.3  | - Case study of current work                                                              | US (MES) |
|                       |          |     |      |        | - Minimum efficient scale of current work                                                 |          |
| [38]                  | NMC622-G | -   | 2025 | 115    | - For production greater than 100000 packs per year                                       | 24       |
| [51]                  | -        | -   | 2025 | 78     | - Total cell cost includes profit                                                         | 25       |
|                       |          |     |      |        | - 24M technology                                                                          |          |

<sup>1, 2, 3</sup> Reported costs in the battery pack, material, and electrode stack levels need to be converted to the battery cell level, <sup>4</sup> the total battery cell cost calculated based on the minimum efficient scale of the plant, discussed in Section 3.3 of this work.

As mentioned in the footer of Table S6, some data in literature and cost models have been reported in battery pack level, material, or electrode stack level. To make an accurate comparison, these data are required to be adjusted to cell cost level by the application of some coefficients extracted from literature and industry. König et al. [52] has been excerpted for relevant ratios based on [1,34,43,53,54] to develop cell cost to battery pack level for three different years. According to the reported value for 2020 in their work, the cell-to-pack cost ratio ranges from 1.94 to 2.21, with a mean value of 2.07. Duffner et al. [47] applied 1.31 as a corrective factor to convert material level to cell cost level and 0.75 for a battery pack to the cell level. Voelcker et al. [55] applied 48% as a scaling factor from cell level to pack. Mauler et al. [56] conducted a detailed study on recent peer-viewed publications, [38,46,57,58], to acquire relevant ratios for converting each level of cost analysis to cell level. These ratios are found in Table S7.

**Table S7.** Relevant ratios to convert different levels of cost to cell level [56]

| Level of cost                     | Ratio  |
|-----------------------------------|--------|
| Cell to battery pack              | 30.89% |
| Electrode stack level to material | 16.14% |
| Material level to cell            | 33.51% |

Implementing the ratios from Table S7 updates Table S6 to the cell cost level. The updated data are presented in Figure 5 to compare the case study of the current project with recent cost models.

## References

- Wentker, M.; Greenwood, M.; Leker, J. A Bottom-Up Approach to Lithium-Ion Battery Cost Modeling with a Focus on Cathode Active Materials. *Energies* 2019, 12, 504, doi:10.3390/en12030504.
- Lithium - 2022 Data - 2017-2021 Historical - 2023 Forecast - Price - Quote - Chart Available online: <https://tradingeconomics.com/commodity/lithium> (accessed on 1 October 2021).
- Activate Conductive Low Price Carbon Black Powder Rubber Ingredient For Pigment - Buy Activate Conductive Low Price Carbon Black Powder,Rubber Ingredient,Pigment Product on Alibaba.Com Available online: [https://www.alibaba.com/product-detail/Conductive-Price-Carbon-Black-Carbon-Powder\\_1600276095965.html?spm=a2700.7724857.normal\\_offer.d\\_title.3d10605cOH7ugH&s=p](https://www.alibaba.com/product-detail/Conductive-Price-Carbon-Black-Carbon-Powder_1600276095965.html?spm=a2700.7724857.normal_offer.d_title.3d10605cOH7ugH&s=p) (accessed on 20 November 2021).
- Peters, J.F.; Peña Cruz, A.; Weil, M. Exploring the Economic Potential of Sodium-Ion Batteries. *Batteries* 2019, 5, 10, doi:10.3390/batteries5010010.
- Patry, G.; Romagny, A.; Martinet, S.; Froelich, D. Cost Modeling of Lithium-Ion Battery Cells for Automotive Applications. *Energy Science & Engineering* 2015, 3, 71–82, doi:10.1002/ese3.47.
- Paul A., N.; Shabbir, A.; Kevin G., G.; Dennis W., D. Modeling the Performance and Cost of Lithium-Ion Batteries for Electric-Drive Vehicles, Third Edition; Argonne National Lab. (ANL), Argonne, IL (United States). Chemical Sciences and Engineering Division: United States, 2019;
- PILLOT, C. The Rechargeable Battery Market and Main Trends 2016 - 2025. Nice Acropolis, France, 2017.
- Barnett, B.; Rempel, J.; Ofer, D.; Oh, B.; Sriramulu, S.; Sinha, J.; Hastbacka, M.; McCoy, C. PHEV BATTERY COST ASSESSMENT. 2010.
- Kennedy, T.; Brandon, M.; Ryan, K.M. Advances in the Application of Silicon and Germanium Nanowires for High-Performance Lithium-Ion Batteries. *Advanced Materials* 2016, 28, 5696–5704, doi:10.1002/adma.201503978.
- High Quality Separator For Lithium Ion Battery - Buy Battery Separator,Battery Separator For Li-Ion Battery,Lithium Ion Battery Separator Product on Alibaba.Com Available online: [https://www.alibaba.com/product-detail/Separator-Lithium-Ion-Battery-High-Quality\\_62326953713.html?spm=a2700.7724857.normal\\_offer.d\\_title.3c757f29koxhON&s=p](https://www.alibaba.com/product-detail/Separator-Lithium-Ion-Battery-High-Quality_62326953713.html?spm=a2700.7724857.normal_offer.d_title.3c757f29koxhON&s=p) (accessed on 20 February 2022).
- 0.012mm 0.035mm 1235 1060 1070 H18 Aluminum Battery Foil For Lithium Ion Battery Current Collector Materials - Buy 0.012mm 0.035mm Which Product For Lithium Ion Battery Current Collector Materials 1235 1060 1070 H18 Aluminum Battery Foil,Aluminum Foil,0.012mm 0.035mm Which Product For Lithium Ion Battery Current Collector Materials 1235 1060 1070 H18 Aluminum Battery Foil Product on Alibaba.Com Available online: [https://www.alibaba.com/product-detail/0-012mm-0-035mm-1235-1060\\_60793531762.html?spm=a2700.7724857.normal\\_offer.d\\_title.1fdc194c8nwBti](https://www.alibaba.com/product-detail/0-012mm-0-035mm-1235-1060_60793531762.html?spm=a2700.7724857.normal_offer.d_title.1fdc194c8nwBti) (accessed on 1 October 2021).
- [Hot Item] High Purity Soft Temper Pure Copper Foil Available online: <https://intcnc.en.made-in-china.com/product/tSuQRDGyaCrW/China-High-Purity-Soft-Temper-Pure-Copper-Foil.html> (accessed on 20 February 2022).
- Heimes, H.H. Lithium-Ion Battery Cell Production Process; 2018; ISBN 978-3-947920-03-7.
- Ciez, R.E.; Whitacre, J.F. Comparison between Cylindrical and Prismatic Lithium-Ion Cell Costs Using a Process Based Cost Model. *Journal of Power Sources* 2017, 340, 273–281, doi:10.1016/j.jpowsour.2016.11.054.
- Xe Currency Converter - Live Exchange Rates Today Available online: <https://www.xe.com/currencyconverter/> (accessed on 23 December 2021).
- Jinasena, A.; Burheim, O.S.; Strømman, A.H. A Flexible Model for Benchmarking the Energy Usage of Automotive Lithium-Ion Battery Cell Manufacturing. *Batteries* 2021, 7, 14, doi:10.3390/batteries7010014.
- Tribe, M.; Alpine, R.L.W. Scale Economies and the “0.6 Rule.” *Engineering Costs and Production Economics* 1986, 10, 271–278, doi:10.1016/S0167-188X(86)80025-8.
- Zang, G.; Zhang, J.; Xu, S.; Xing, Y. Techno-Economic Analysis of Cathode Material Production Using Flame-Assisted Spray Pyrolysis. *Energy* 2021, 218, 119504, doi:10.1016/j.energy.2020.119504.

19. Ahmed, S.; Nelson, P.A.; Gallagher, K.G.; Susarla, N.; Dees, D.W. Cost and Energy Demand of Producing Nickel Manganese Cobalt Cathode Material for Lithium Ion Batteries. *Journal of Power Sources* 2017, 342, 733–740, doi:10.1016/j.jpowsour.2016.12.069.
20. Granata, G.; Ferreira, R.; Petrides, D. Production of Lithium Ion Battery Cathode Material (NMC 811) from Primary and Secondary Raw Materials - Techno-Economic Assessment with SuperPro Designer; 2020;
21. Brodd, R.J.; Helou, C. Cost Comparison of Producing High-Performance Li-Ion Batteries in the U.S. and in China. *Journal of Power Sources* 2013, 231, 293–300, doi:10.1016/j.jpowsour.2012.12.048.
22. Sakti, A.; Michalek, J.J.; Fuchs, E.R.H.; Whitacre, J.F. A Techno-Economic Analysis and Optimization of Li-Ion Batteries for Light-Duty Passenger Vehicle Electrification. *Journal of Power Sources* 2015, 273, 966–980, doi:10.1016/j.jpowsour.2014.09.078.
23. Simon, R. Qualitäts-Und Kostenoptimierung in Lithium-Ionen-Batteriefabriken. *Forum MobiliTech*, 2013.
24. Chung, D.; Elgqvist, E.; Santhanagopalan, S. Automotive Lithium-Ion Cell Manufacturing: Regional Cost Structures and Supply Chain Considerations. Technical Report 2016, 25.
25. Statistics on Labour Costs Available online: <https://ilostat.ilo.org/topics/labour-costs/> (accessed on 23 December 2021).
26. Manufacturing Labor Costs per Hour: China, Vietnam, Mexico 2016-2020 Available online: <https://www.statista.com/statistics/744071/manufacturing-labor-costs-per-hour-china-vietnam-mexico/> (accessed on 23 December 2021).
27. National Bureau of Statistics of China Average Annual Wage of Employed Persons in Different Positions in Enterprises above Designated Size in 2019 Available online: [http://www.stats.gov.cn/english/PressRelease/202005/t20200518\\_1746069.html](http://www.stats.gov.cn/english/PressRelease/202005/t20200518_1746069.html) (accessed on 23 December 2021).
28. Workers in China Set to See a Real Salary Increase of 3.6% in 2020 Available online: <https://www.eca-international.com/News/November-2019/Workers-in-China-set-to-see-a-real-salary-increase> (accessed on 23 December 2021).
29. South Korea Total Monthly Wages in Manufacturing - 2021 Data - 2022 Forecast Available online: <https://tradingeconomics.com/south-korea/wages-in-manufacturing> (accessed on 1 December 2021).
30. Australian Trade and Investment Commission THE LITHIUM-ION BATTERY VALUE CHAIN - New Economy Opportunities for Australia; Australian Trade and Investment Commission: Sydney - Australia, 2018;
31. ホーム | 厚生労働省 Available online: <https://www.mhlw.go.jp/index.html> (accessed on 26 July 2022).
32. Electricity Prices around the World Available online: [https://www.globalpetrolprices.com/electricity\\_prices/](https://www.globalpetrolprices.com/electricity_prices/) (accessed on 1 October 2021).
33. International Construction Market Survey 2021; Turner & Townsend: UK;
34. Philippot, M.; Alvarez, G.; Ayerbe, E.; Van Mierlo, J.; Messagie, M. Eco-Efficiency of a Lithium-Ion Battery for Electric Vehicles: Influence of Manufacturing Country and Commodity Prices on GHG Emissions and Costs. *Batteries* 2019, 5, 23, doi:10.3390/batteries5010023.
35. United States Average Hourly Wages in Manufacturing - January 2022 Data Available online: <https://tradingeconomics.com/united-states/wages-in-manufacturing> (accessed on 23 December 2021).
36. Real Interest Rate By Country Available online: <https://tradingeconomics.com/country-list/real-interest-rate-percent-wb-data.html> (accessed on 1 December 2021).
37. Republic of Korea Real Interest Rate, 1960-2021 - Knoema.Com Available online: <https://knoema.com/atlas/Republic-of-Korea/topics/Economy/Financial-Sector-Interest-rates/Real-interest-rate> (accessed on 1 December 2021).
38. PILLOT, C. The Rechargeable Battery Market and Main Trends 2018-2030. Lyon, France, 2019.
39. The Lithium-Ion Battery Value Chain. Stuttgart-Germany, 2012.
40. Wood, D.L.; Li, J.; Daniel, C. Prospects for Reducing the Processing Cost of Lithium Ion Batteries. *Journal of Power Sources* 2015, 275, 234–242, doi:10.1016/j.jpowsour.2014.11.019.
41. Nelson, P.A.; Ahmed, S.; Gallagher, K.G.; Dees, D.W. Cost Savings for Manufacturing Lithium Batteries in a Flexible Plant. *Journal of Power Sources* 2015, 283, 506–516, doi:10.1016/j.jpowsour.2015.02.142.
42. Berckmans, G.; Messagie, M.; Smekens, J.; Omar, N.; Vanhaverbeke, L.; Van Mierlo, J. Cost Projection of State of the Art Lithium-Ion Batteries for Electric Vehicles Up to 2030. *Energies* 2017, 10, 1314, doi:10.3390/en10091314.
43. Schmuch, R.; Wagner, R.; Hörpel, G.; Placke, T.; Winter, M. Performance and Cost of Materials for Lithium-Based Rechargeable Automotive Batteries. *Nat Energy* 2018, 3, 267–278, doi:10.1038/s41560-018-0107-2.
44. Schnell, J.; Knörzer, H.; Imbsweiler, A.J.; Reinhart, G. Solid versus Liquid—A Bottom-Up Calculation Model to Analyze the Manufacturing Cost of Future High-Energy Batteries. *Energy Technology* 2020, 8, 1901237, doi:10.1002/ente.201901237.
45. Wang, F.; Deng, Y.; Yuan, C. Design and Cost Modeling of High Capacity Lithium Ion Batteries for Electric Vehicles through A Techno-Economic Analysis Approach. *Procedia Manufacturing* 2020, 49, 24–31, doi:10.1016/j.promfg.2020.06.006.

46. Henze, V. Battery Pack Prices Cited Below \$100/KWh for the First Time in 2020, While Market Average Sits at \$137/KWh Available online: <https://about.bnef.com/blog/battery-pack-prices-cited-below-100-kwh-for-the-first-time-in-2020-while-market-average-sits-at-137-kwh/> (accessed on 27 December 2021).
47. Duffner, F.; Mauler, L.; Wentker, M.; Leker, J.; Winter, M. Large-Scale Automotive Battery Cell Manufacturing: Analyzing Strategic and Operational Effects on Manufacturing Costs. *International Journal of Production Economics* 2021, 232, 107982, doi:10.1016/j.ijpe.2020.107982.
48. Ziegler, M.S.; Trancik, J.E. Re-Examining Rates of Lithium-Ion Battery Technology Improvement and Cost Decline. *Energy Environ. Sci.* 2021, 14, 1635–1651, doi:10.1039/D0EE02681F.
49. Edelstein, S. Report: EV Battery Costs Hit Another Low in 2021, but They Might Rise in 2022 Available online: [https://www.greencarreports.com/news/1134307\\_report-ev-battery-costs-might-rise-in-2022](https://www.greencarreports.com/news/1134307_report-ev-battery-costs-might-rise-in-2022) (accessed on 1 December 2021).
50. DOE Estimates That EV Battery Pack Costs in 2021 Are 87% Lower than in 2008 Available online: <https://www.greencarcongress.com/2021/10/20211005-fotw.html> (accessed on 23 December 2021).
51. Clean Battery Solutions for a Better Planet; FREYR - Clean battery solutions / alussa energy, 2021; p. 11;.
52. König, A.; Nicoletti, L.; Schröder, D.; Wolff, S.; Waclaw, A.; Lienkamp, M. An Overview of Parameter and Cost for Battery Electric Vehicles. *World Electric Vehicle Journal* 2021, 12, 21, doi:10.3390/wevj12010021.
53. Kochhan, R.; Fuchs, S.; Reuter, B.; Burda, P.; Matz, S.; Lienkamp, M. An Overview of Costs for Vehicle Components, Fuels and Greenhouse Gas Emissions. 2014.
54. Cano, Z.P.; Banham, D.; Ye, S.; Hintennach, A.; Lu, J.; Fowler, M.; Chen, Z. Batteries and Fuel Cells for Emerging Electric Vehicle Markets. *Nat Energy* 2018, 3, 279–289, doi:10.1038/s41560-018-0108-1.
55. Voelcker, J. Electric-Car Battery Costs: Tesla \$190 per Kwh for Pack, GM \$145 for Cells Available online: [https://www.greencarreports.com/news/1103667\\_electric-car-battery-costs-tesla-190-per-kwh-for-pack-gm-145-for-cells](https://www.greencarreports.com/news/1103667_electric-car-battery-costs-tesla-190-per-kwh-for-pack-gm-145-for-cells) (accessed on 28 December 2021).
56. Mauler, L.; Duffner, F.; Zeier, W.G.; Leker, J. Battery Cost Forecasting: A Review of Methods and Results with an Outlook to 2050. *Energy Environ. Sci.* 2021, 14, 4712–4739, doi:10.1039/D1EE01530C.
57. Kittner, N.; Lill, F.; Kammen, D.M. Energy Storage Deployment and Innovation for the Clean Energy Transition. *Nat Energy* 2017, 2, 1–6, doi:10.1038/nenergy.2017.125.
58. Kwade, A.; Haselrieder, W.; Leithoff, R.; Modlinger, A.; Dietrich, F.; Droeder, K. Current Status and Challenges for Automotive Battery Production Technologies. *Nat Energy* 2018, 3, 290–300, doi:10.1038/s41560-018-0130-3.
