# Supplementary material for: A Techno-Economic Model for Benchmarking the Production Cost of Lithium-Ion Battery Cells
Source: MDPI journal article supplement (doi:10.3390/batteries8080083), 2022-08-05
Supplement: s1 [file s1]

Archive with 1 entries (1 files):
- batteries-1832835-supplementary.pdf
